# Supplementary material for: Programmable magnetic robot (ProMagBot) for automated nucleic acid extraction at the point of need
Source: Royal Society of Chemistry journal article supplement (doi:10.1039/d3lc00545c), 2023-01-01
Supplement: d3lc00545c5.pdf [file d3lc00545c5.pdf]

## **Programmable Magnetic Robot (ProMagBot) for Automated Nucleic Acid Extraction at the Point of Need**

Anthony J. Politza<sup>1</sup>, Tianyi Liu<sup>2</sup>, and Weihua Guan<sup>1, 2, 3\*</sup>

<sup>1</sup> Department of Biomedical Engineering, Pennsylvania State University, University Park 16802,  
USA

<sup>2</sup> Department of Electrical Engineering, Pennsylvania State University, University Park 16802,  
USA

<sup>3</sup> School of Electrical Engineering and Computer Science, Pennsylvania State University,  
University Park 16802, USA

\* Corresponding Author, Email: wzg111@psu.edu

### **Contents**

|                               |   |
|-------------------------------|---|
| Supplementary Figures .....   | 2 |
| Supplementary Tables.....     | 4 |
| Supplementary Videos .....    | 8 |
| Supplementary References..... | 9 |

## Supplementary Figures

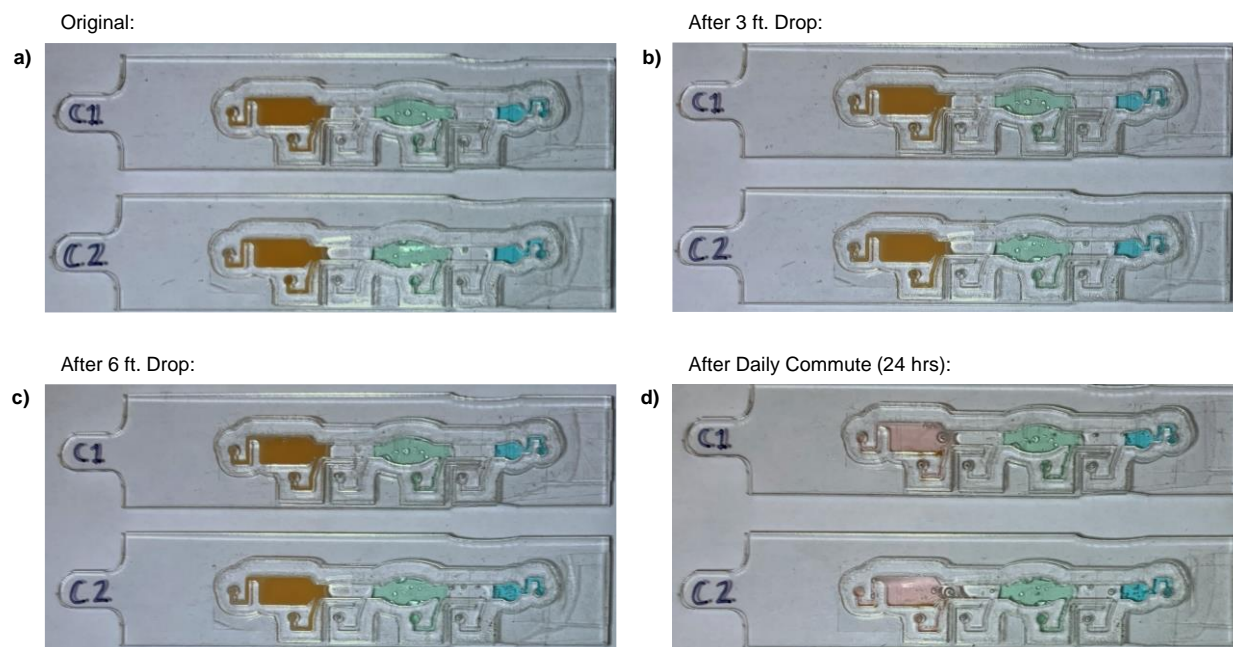

**Figure S1.** Cartridge Durability Testing. (a) Original cartridges directly after fabrication and loading. (b) Cartridges were dropped from 3ft and then imaged. (c) Cartridges were then dropped from 6ft and then imaged. (d) Cartridges were sealed in plastic zipper bags, carried on-person during a daily commute, and then imaged.

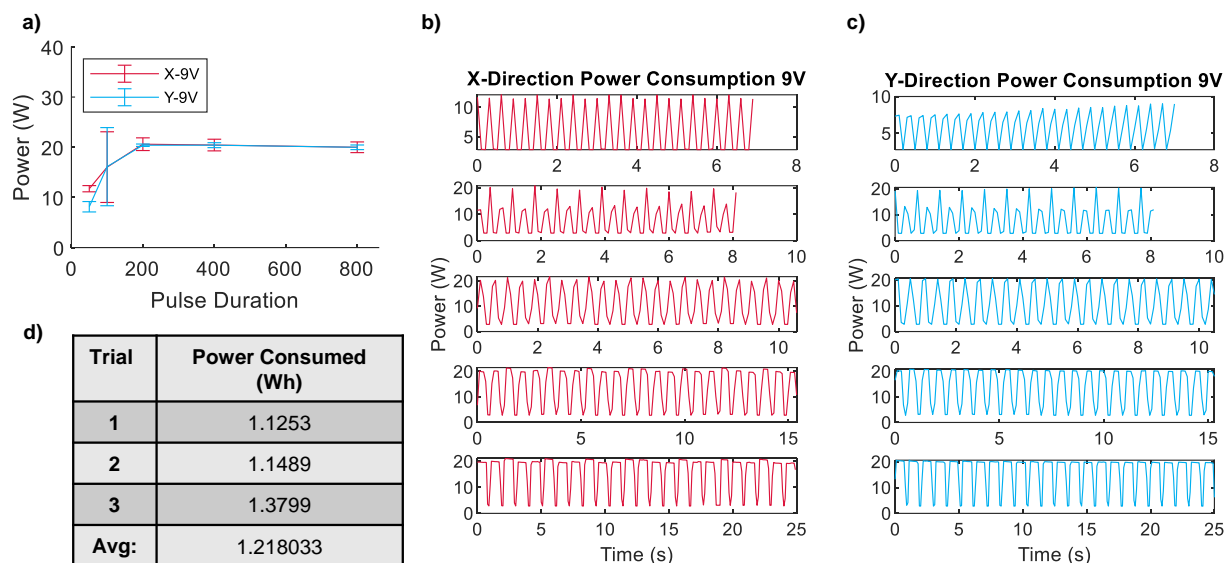

**Figure S2.** Device power consumption. (a) Power per pulse for varying pulse durations. The activation frequency was kept at 1 Hz, and 25 pulses were recorded. Raw data plots of power for each recorded trial starting from 50 ms (top) to 800 ms (bottom) for X-Direction movement (b) and Y-Direction movement (c). (d) Summarized total power consumption of the device when recorded over three separate trials.

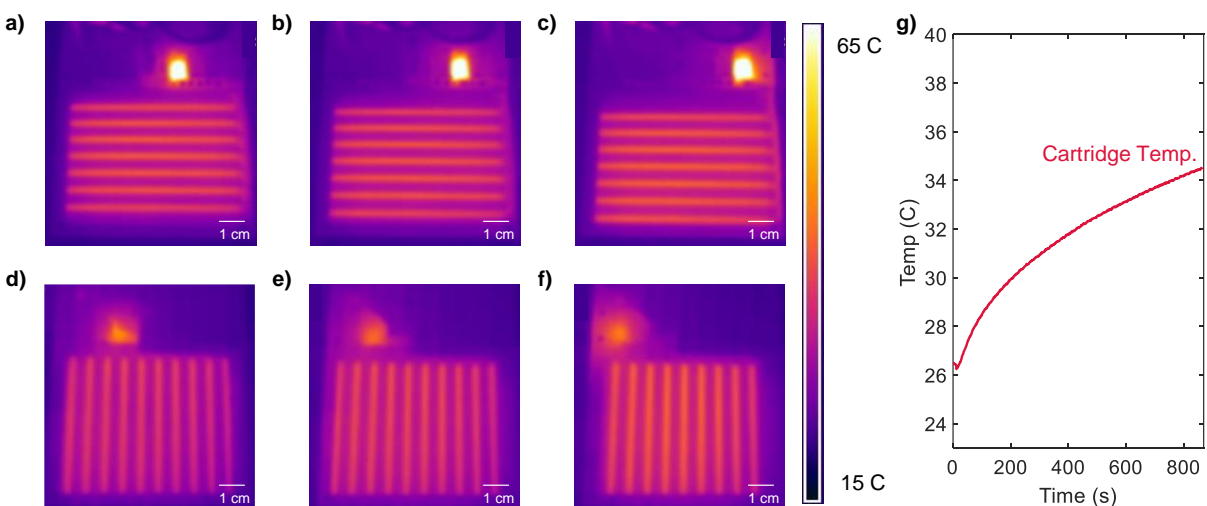

**Figure S3.** Thermal distribution and response. Thermal images of each coil group for Y-Direction motion (a)-(c) and X-Direction motion (d)-(f). Note that the MOSFETs are the hotspot in each image. However, after 5 s, the coils and PCB do not reach excessive temperatures above 60 C. (g) Cartridge temperature throughout an extraction procedure. Temperatures do not rise above 35 C.

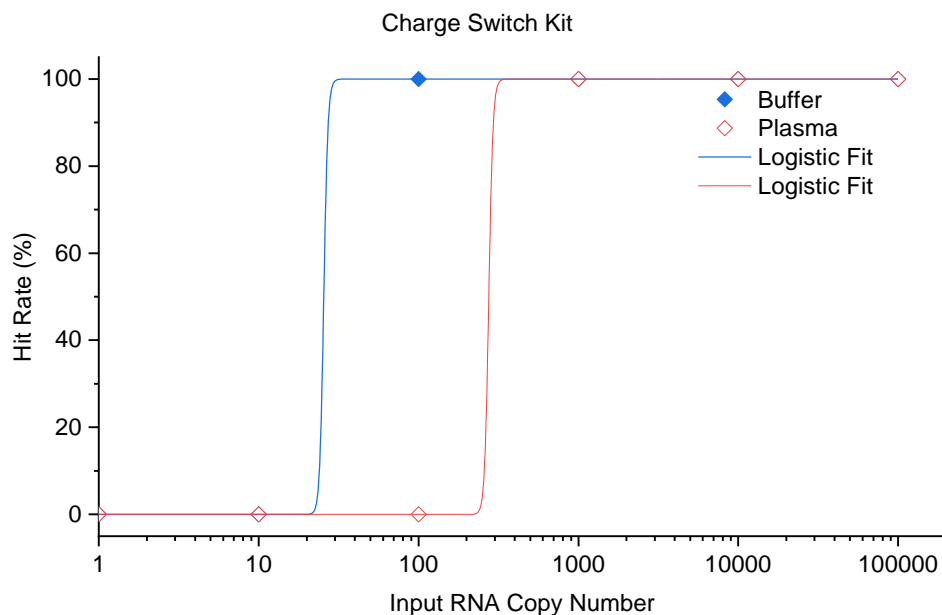

**Figure S4.** Hit rate analysis for the Charge Switch extraction kit when operated with the ProMagBot. Limits of efficiency were determined from the smallest copy number to show 100% ( $n > 3$ ).

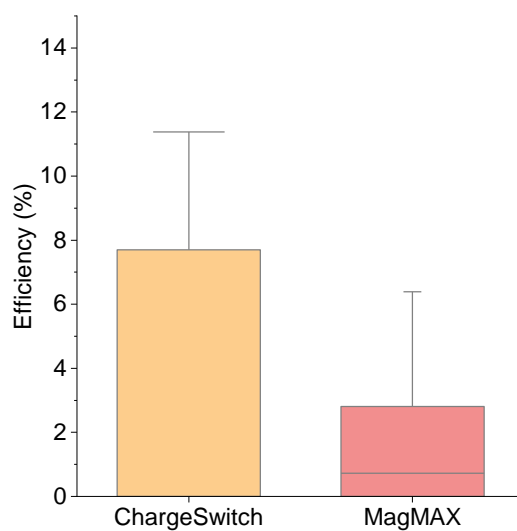

**Figure S5.** The extraction efficiency of two commercial bead kits using the ProMagBot protocol. Efficiency was calculated from an extracted sample analyzed with a qRT-PCR assay ( $n = 6$ ).

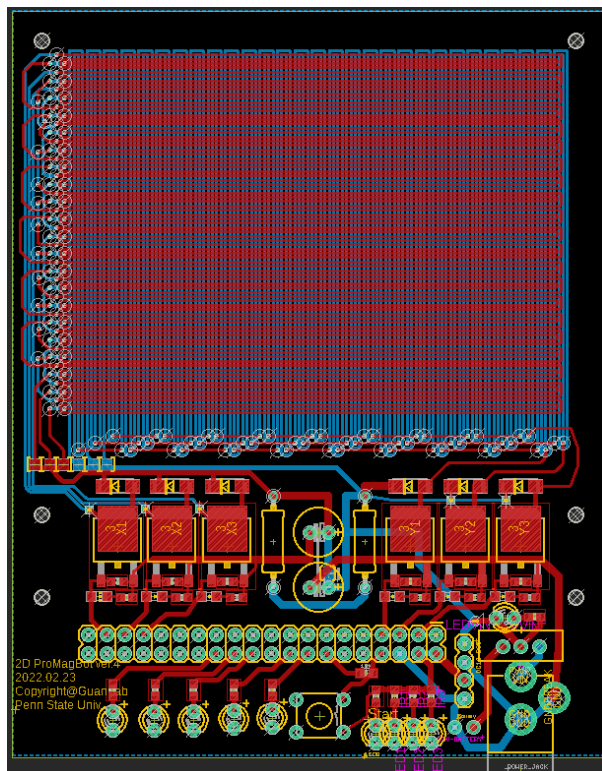

**Figure S6.** Hardware design of the ProMagBot PCB. Six transistor switches control 3-phases of coils along both the X and Y directions.

## Supplementary Tables

Table S1. Cartridge and assay materials

| Reagents            | Vendor        | Function          | Stock Vol (mL)     | Unit Cost (\$) | Volume (μL)/rxn     | Ext Cost/rxn  |
|---------------------|---------------|-------------------|--------------------|----------------|---------------------|---------------|
| Lysis Buffer        | Invitrogen    | Sample Prep.      | 25                 | 6              | 100                 | 0.02          |
| Wash Buffer         | Invitrogen    | Sample Prep.      | 37.5               | 54             | 85                  | 0.12          |
| Elution Buffer      | Invitrogen    | Sample Prep.      | 11                 | 35             | 30                  | 0.10          |
| Proteinase K        | Invitrogen    | Sample Prep.      | 0.25               | 10             | 1                   | 0.04          |
| Magnetic Beads      | Invitrogen    | Sample Prep.      | 5                  | 220            | 20                  | 0.88          |
| Mineral Oil         | Sigma Aldrich | Sample Prep.      | 1000               | 42             | 160                 | 0.01          |
| Solvent             | ePlastics     | Cartridge Solvent | 118                | 9.9            | 100                 | 0.01          |
| Material            | Vendor        | Function          | Stock Vol (sq. m.) | Unit Cost (\$) | Volume (sq. mm)/rxn | Ext Cost/rxn  |
| 1/32" Acrylic Sheet | ePlastics     | Cartridge         | 0.5                | 16.13          | 20                  | 0.65          |
| 1/16" Acrylic Sheet | ePlastics     | Cartridge         | 0.5                | 9              | 40                  | 0.72          |
| <b>Total</b>        |               |                   |                    |                |                     | <b>\$3.91</b> |

Table S2. ProMagBot device components

| System            | Vendor        | Description                    | Function                                        | Unit Cost (\$) | Unit Qty. | Ext Cost (\$)   |
|-------------------|---------------|--------------------------------|-------------------------------------------------|----------------|-----------|-----------------|
| Electronics       | Digikey       | DC Barrel Power Jack/Connector | Power Connector                                 | \$0.69         | 1.00      | \$0.69          |
| Electronics       | Digikey       | Power Resistor, 10Ω            | Power stabilizing                               | \$0.01         | 2.00      | \$0.01          |
| Electronics       | Digikey       | Capacitor 10uF                 | Power stabilizing                               | \$0.15         | 2.00      | \$0.29          |
| Electronics       | Digikey       | N Channel Power MOSFET         | Switch for PCB coils                            | \$0.88         | 6.00      | \$5.25          |
| Electronics       | Digikey       | SMD Blue LED                   | Coil Group indication (internal)                | \$0.53         | 6.00      | \$3.18          |
| Electronics       | Digikey       | Resistors 510 Ohm              | Resistor for LEDs                               | \$0.01         | 9.00      | \$0.09          |
| Electronics       | Digikey       | Cree Wide Angle LED            | Illumination of Stage & Robot for camera vision | \$0.07         | 3.00      | \$0.20          |
| Electronics       | Adafruit      | Jumper Wires                   | Electrical Connections                          | \$0.25         | 20.00     | \$5.00          |
| Electronics       | Digikey       | Switch                         | Wall or Battery Selection                       | \$1.09         | 1.00      | \$1.09          |
| Electronics       | Digikey       | Indication LED bar             | User Indicator                                  | \$2.09         | 1.00      | \$2.09          |
| Electronics       | Digikey       | Tactile Button (Momentary)     | Start Device extraction protocol                | \$5.99         | 0.01      | \$0.05          |
| Electronics       | Digikey       | Indication LED                 | Power Light                                     | \$0.98         | 1.00      | \$0.98          |
| Electronics       | Adafruit      | UBEC DC/DC Step-Down Converter | Rasp-Pi Power Delivery                          | \$9.95         | 1.00      | \$9.95          |
| Electronics       | Canakit       | Raspberry Pi 4                 | Controller and OS                               | \$75.00        | 1.00      | \$75.00         |
| Electronics       | Canakit       | Pi Camera                      | Camera                                          | \$25.00        | 1.00      | \$25.00         |
| Power Supply      | HobbyKing     | Zippy Compact Battery          | Battery                                         | \$13.00        | 1.00      | \$13.00         |
| Power Supply      | HobbyKing     | Charging Cable                 | ProMagBot Charging                              | \$6.00         | 0.10      | \$0.60          |
| Power Supply      | HobbyKing     | XT60 Splitter Cable            | Power Delivery & Charging                       | \$3.99         | 1.00      | \$3.99          |
| Power Supply      | Amazon        | 9V Power Supply                | External Power Supply                           | \$9.98         | 1.00      | \$9.98          |
| Magnet            | K&J Magnets   | Neodymium Disc Magnet Nickel   | Magnetic Robot                                  | \$0.43         | 1.00      | \$0.43          |
| PCB               | OSH Park      | Custom PCB - Manufacturing     | EM and System Control                           | \$22.00        | 1.00      | \$22.00         |
| Case              | Inventables   | 1/8" PMMA                      | Viewing Window and Illumination Guide           | \$15.00        | 0.03      | \$0.45          |
| Case              | MakerBot      | 3D Printed ABS Filament        | Electronic Housing                              | \$60.00        | 0.50      | \$30.00         |
| Case              | MakerBot      | 3D Printed ABS                 | Magnet Spacer                                   | \$60.00        | 0.01      | \$0.60          |
| Case              | McMaster-Carr | Nylon M2 Screws & Nuts         | Assembly                                        | \$11.22        | 0.20      | \$2.24          |
| <b>Total Cost</b> |               |                                |                                                 |                |           | <b>\$209.32</b> |

**Table S3. RT-qPCR primer set targeting HIV-1 <sup>1</sup>**

| <b>Component</b> | <b>Sequence (5' – 3')</b>          |
|------------------|------------------------------------|
| Forward          | CATGTTTTTCAGCATTATCAGAAGGA         |
| Reverse          | TGCTTGATGTCCCCCACT                 |
| Probe            | FAM-CCACCCCAAGATTTAAACACCATGCTAA-Q |

**Table S4. Extraction workflow comparison**

| <b>Workflow</b> | <b>Number of Manual Steps</b> | <b>Number of Pre-Loading Steps</b> | <b>Cost per Extraction</b> | <b>Manual Processing Time (min)</b> | <b>Total Time (min)</b> |
|-----------------|-------------------------------|------------------------------------|----------------------------|-------------------------------------|-------------------------|
| ChargeSwitch    | 9                             |                                    | N/A \$ 6.78                | 20                                  | 20                      |
| MagMAX          | 8                             |                                    | N/A \$ 7.14                | 20                                  | 20                      |
| ProMagBot       | 4                             | 4                                  | \$ 3.91                    | 3-5                                 | 20                      |

## Supplementary Videos

**Supplementary Video S1. (Duration 1 m 25 s)** Demonstration of Magnet-On-Top method for passive precipitation mixing. As the magnet approaches the beads in the solution below, they are collected at the top surface. When the magnet is removed, the beads precipitate through the solution, inducing mixing.

**Supplementary Video S2. (Duration 2 m)** Workflow of automated ProMagBot extraction system.

**Supplementary Video S3. (Duration 21 s)** Representation of multiple pathways of motion in 2D space.

**Supplementary Video S4. (Duration 2 m 19 s)** Programmed pathway and bead response during nucleic acid extraction procedures.



## Supplementary References

1. S. Palmer, A. P. Wiegand, F. Maldarelli, H. Bazmi, J. M. Mican, M. Polis, R. L. Dewar, A. Planta, S. Liu and J. A. Metcalf, *Journal of clinical microbiology*, 2003, **41**, 4531-4536.
